# Supplementary material for: EDC-promoted one-step synthesis of teriflunomide at the industrial scale
Source: Royal Society of Chemistry journal article supplement (doi:10.1039/d2re00431c), 2022-01-01
Supplement: d2re00431c1.pdf [file d2re00431c1.pdf]

ESI for

## **EDC-promoted one-step synthesis of *Teriflunomide* at industrial scale**

Lei Wang,<sup>a,b</sup> Rongrong Qian,<sup>c</sup> Youxian Wang,<sup>b</sup> and Lei Yu<sup>\*a</sup>

<sup>a</sup> School of Chemistry and Chemical Engineering, Yangzhou University, Yangzhou, 225002, China. E-mail: [yulei@yzu.edu.cn](mailto:yulei@yzu.edu.cn) (L. Yu).

<sup>b</sup> Jiangsu Kangyuan Pharmaceutical Co., Ltd, Lianyungang, Jiangsu 222000, P. R. China.

<sup>c</sup> Jiangsu College of Tourism, Yangzhou, 225009, Jiangsu, P. R. China.

\* E-mail: [yulei@yzu.edu.cn](mailto:yulei@yzu.edu.cn) (L. Yu); Tel: +86-136-6529-5901; Fax: +86-514-87975244

## **CONTENTS**

|                                                    |              |
|----------------------------------------------------|--------------|
| <b>Experimental details</b> .....                  | <b>S2</b>    |
| <b>NMR spectra of <i>Teriflunomide</i></b> .....   | <b>S4-S6</b> |
| <b>HPLC spectrum of <i>Teriflunomide</i></b> ..... | <b>S7</b>    |

## 1. Experimental details

### General methods

Reagents and solvents were purchased from the reagent companies. They were analytical pure and were directly used after receiving without any additional treatment. NMR spectra were recorded on a Bruker AVENCE 400 MHz instrument using DMSO-*d*<sub>6</sub> as the solvent and Me<sub>4</sub>Si as the internal standard. Chemical shifts for <sup>1</sup>H NMR were referred to internal Me<sub>4</sub>Si (0 ppm) and *J*-values were shown in Hz. Melting-point of the product was determined by WRS-2A digital instrument. HRMS (ESI) analysis was measured on a Bruker micro TOF-Q II instrument.

### Synthetic procedures:

*Synthesis of Teriflunomide in the reaction scale using 31 mmol of 3:* 31 mmol of 4-aminobenzotrifluoride (**3**, 5.0 g), 93 mmol of 5-methylisoxazole-4-carboxylic acid (**1**, 11.8 g) and 46.5 mmol of EDC (7.1 g) were initially dissolved in 100 mL of DCM. The mixture was then added into a 250 mL three-necked round bottom flask equipped with a piece of magnetic stirring bar and condenser. The system was heated to 35 °C and magnetically stirred for 4 hours. After reaction, it was cooled to -5–5 °C, and poured into a 500 mL beaker containing 100 mL of aqueous HCl (0.6 mol/L) and a piece of magnetic bar. The mixture was magnetically stirred for about 3–4 hours at -5–5 °C. The precipitated crystal was separated by filtration. It was washed by water, ethanol absolute, and then dried in a vacuum oven to obtain the white solid as final product *Teriflunomide* (7.6 g, yielding 91%).

*Semi-industrial production of Teriflunomide:* To a 250 L reactor, 5.0 kg of 4-aminobenzotrifluoride (**3**), 11.8 kg of 5-methylisoxazole-4-carboxylic acid (**1**) and 7.1 kg of EDC were added. 100 L of DCM was then pumped into the kettle and the mixture was mechanically stirred for 0.5 h to well dissolve the reactants. The kettle was gradually heated to 35 °C, and was stirred at this temperature for 4 hours. After then, it was cooled to -5–5 °C. The mixture was then removed into a 500 L tank containing 100 L of aqueous HCl (0.6 mol/L) and cooling by ice water. The mixture was stirred for about 5 hours at -5–5 °C. The precipitated crystal was separated by filtration. It was washed by water, ethanol absolute, and then dried in a vacuum oven to obtain the white solid as final product *Teriflunomide* (7.5 kg, yielding 90%).

### **Characterization Data of the Products**

*Teriflunomide* (**5**). 7.5 kg, yielding 90%. White solid, m.p. 230.2–232.1 °C (*lit.* 229–232 °C). <sup>1</sup>H NMR (400 MHz, DMSO-*d*<sub>6</sub>, TMS, ppm): δ 10.35 (s, 1H), 9.10 (s, 1H), 7.93 (d, *J* = 8.5 Hz, 2H), 7.73 (d, *J* = 8.6 Hz, 2H), 2.70 (s, 3H); <sup>13</sup>C NMR (100 MHz, DMSO-*d*<sub>6</sub>, TMS, ppm): δ 173.82, 160.06, 149.49, 142.70, 126.33 (*J*<sub>C-F</sub> = 34 Hz), 125.29 (*J*<sub>C-F</sub> = 235 Hz), 124.42, 120.45, 112.22, 12.65; <sup>13</sup>C NMR (376 MHz, CDCl<sub>3</sub>, TMS, ppm): δ 62.39; HRMS (ESI-TOF) *m/z* [M-H]<sup>-</sup> calcd for C<sub>12</sub>H<sub>8</sub>F<sub>3</sub>N<sub>2</sub>O<sub>2</sub> 269.0543, found 269.0557; Known Compound.<sup>1</sup>

### **Reference**

1. M. Kurz, D. Gretzke, R. Hörlein, S. Turpault, J. Atzrodt and V. Derdau, *J. Labelled Compd. Rad.*, 2021, **64**, 82.

## 2. NMR spectra of Teriflunomide

Teriflunomide,  $^1\text{H}$  NMR, DMSO, 400 MHz

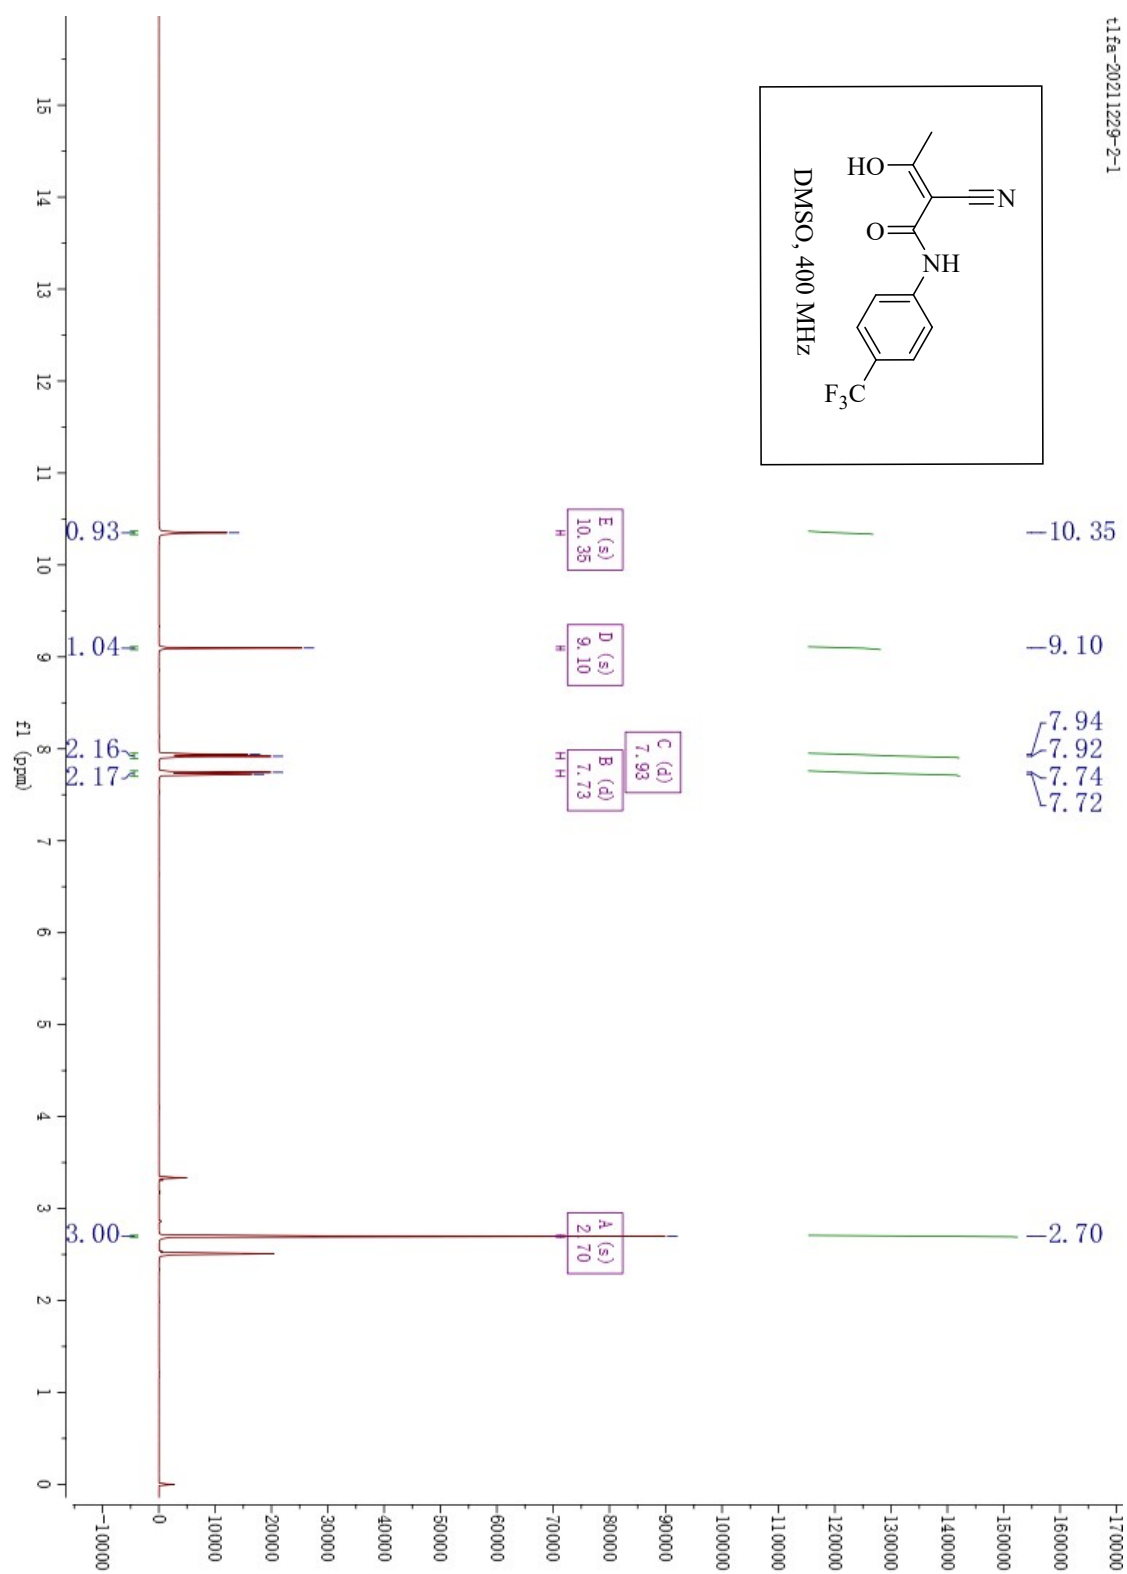

Figure S1.  $^1\text{H}$  NMR spectrum of Teriflunomide.

Teriflunomide,  $^{13}\text{C}$  NMR, DMSO, 400 MHz

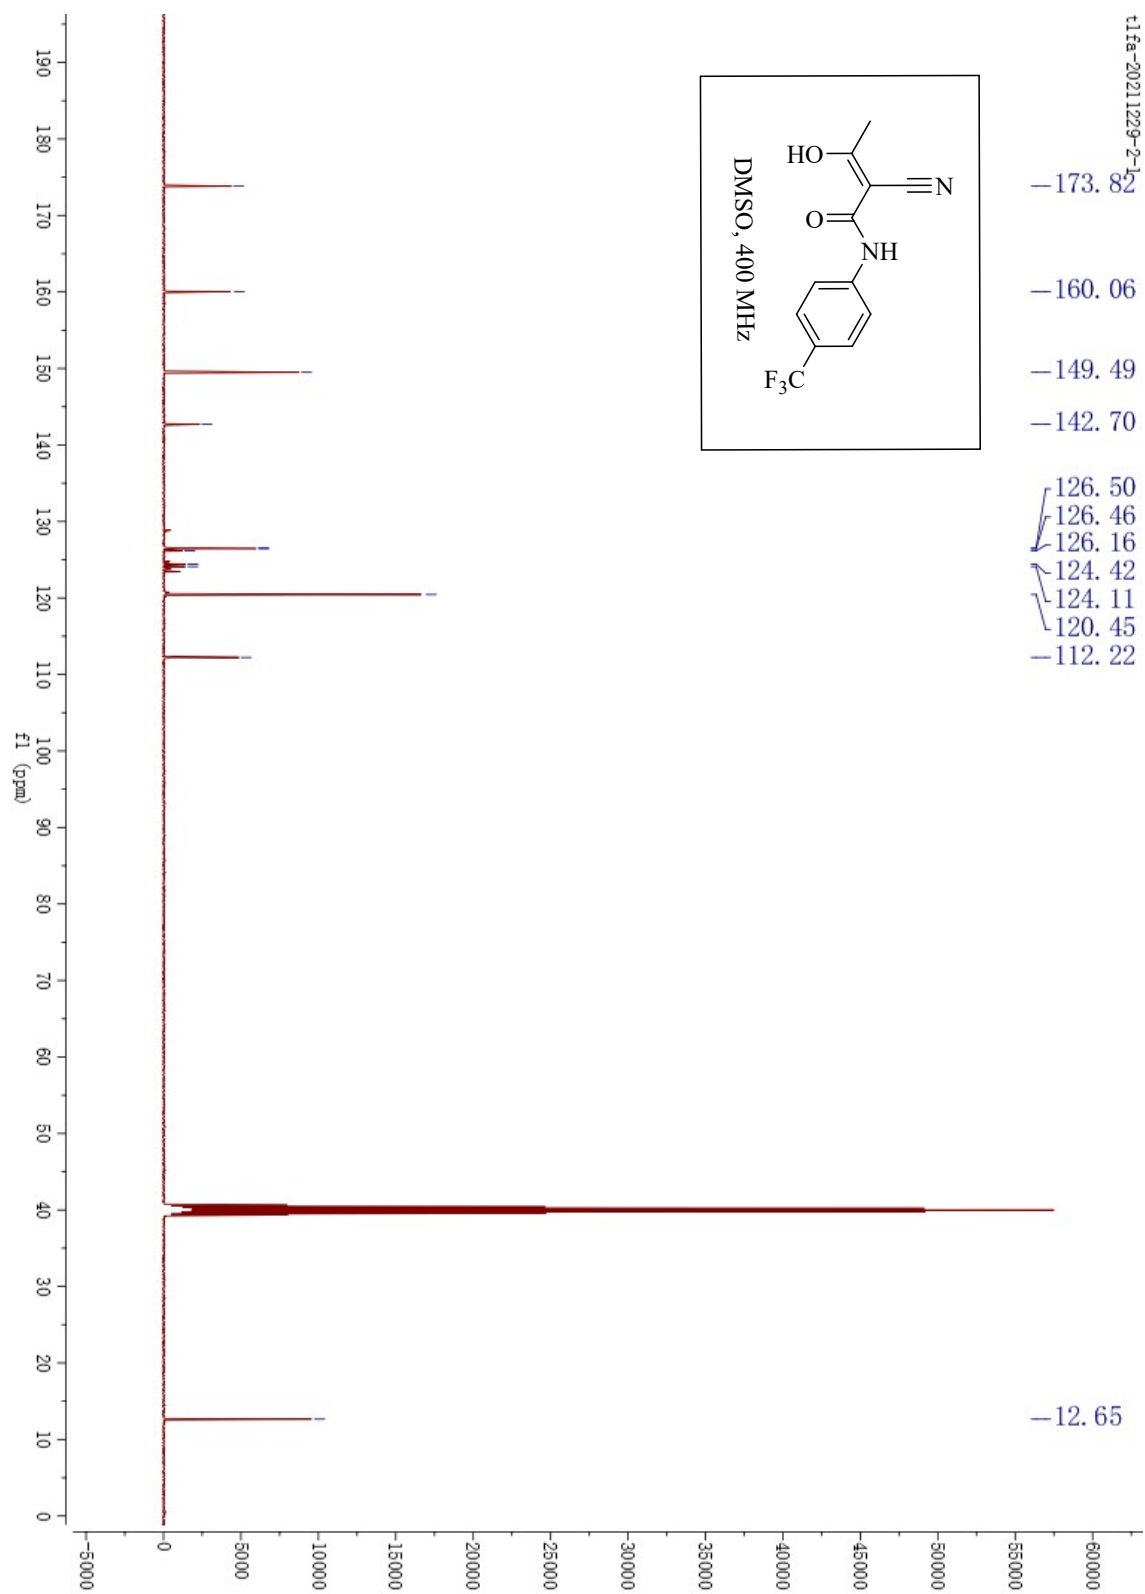

Figure S2.  $^{13}\text{C}$  NMR spectra of Teriflunomide.

*Teriflunomide*,  $^{19}\text{F}$  NMR,  $\text{CDCl}_3$ , 376 MHz

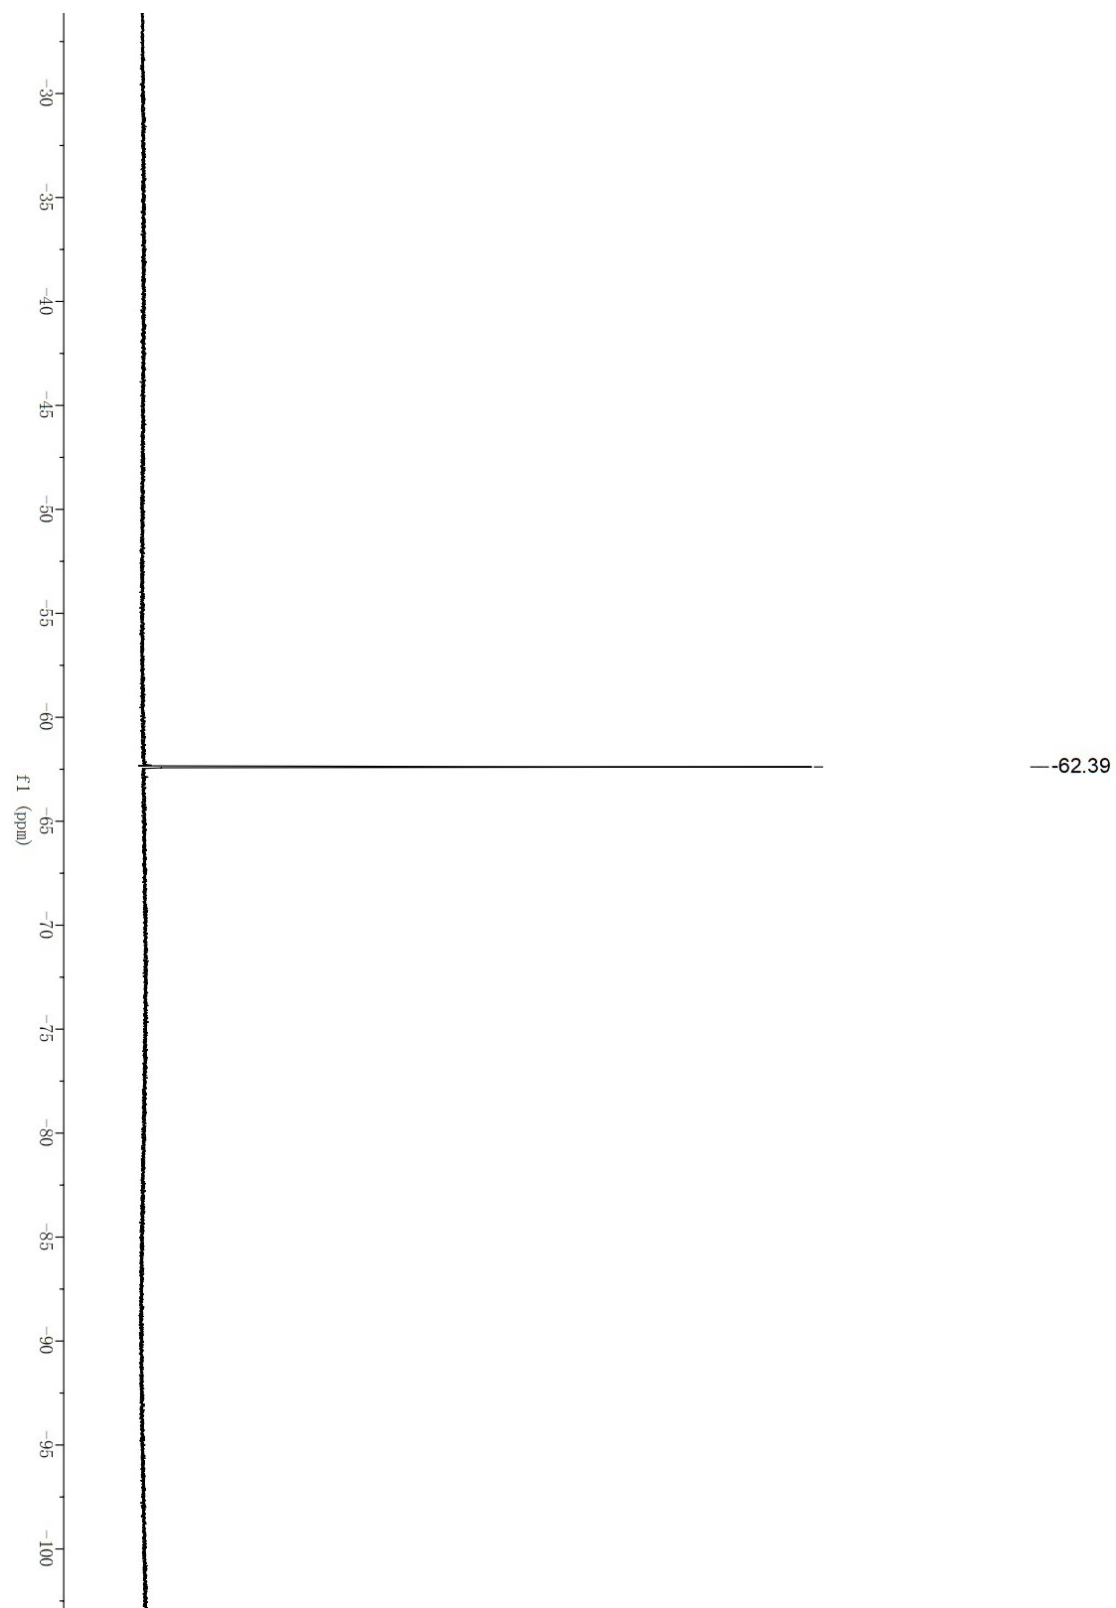

**Figure S3.**  $^{19}\text{F}$  NMR spectrum of *Teriflunomide*.

### 3. HPLC spectrum of *Teriflunomide*

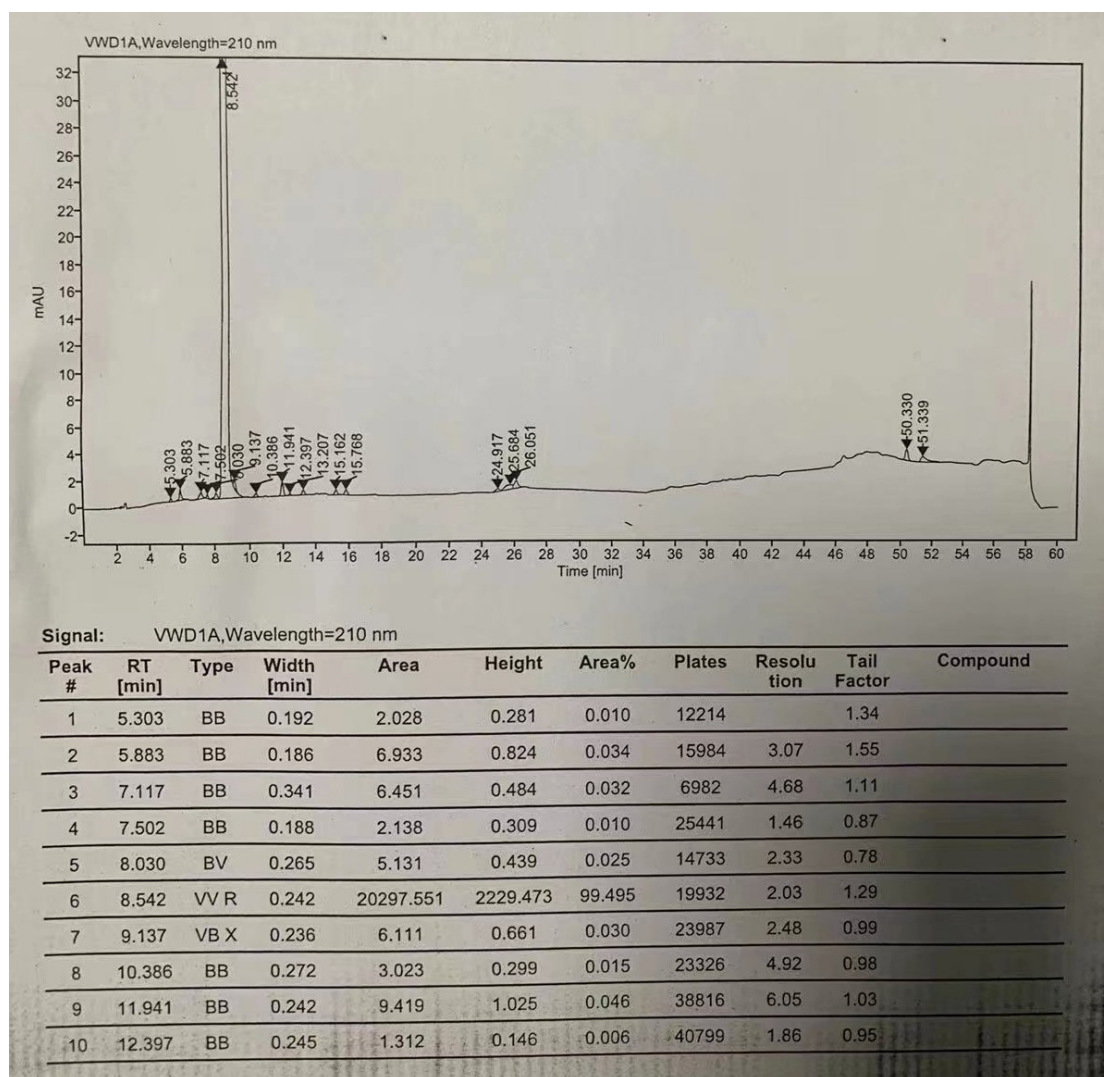

Figure S4. HPLC spectrum of *Teriflunomide*.
